# Supplementary material for: Survey on Recommended Health Care for Adult Patients with Myelodysplastic Syndromes Identifies Areas for Improvement
Source: MDPI journal article supplement (doi:10.3390/ijerph17249562), 2020-12-21
Supplement: s1 [file s1]

**Supplemental table 1: Questions with insufficient feedbacks.**

| Questions                                                                                                                                                                                                             | Feedback   |
|-----------------------------------------------------------------------------------------------------------------------------------------------------------------------------------------------------------------------|------------|
| <b>1. Diagnostic evaluation</b>                                                                                                                                                                                       |            |
| <b>Molecular diagnostics</b>                                                                                                                                                                                          |            |
| Please specify the single genes you screen                                                                                                                                                                            | 3 (7.0%)   |
| <b>2. Risk-stratification</b>                                                                                                                                                                                         |            |
| <b>Other</b>                                                                                                                                                                                                          |            |
| Which geriatric assessment tools do you use?                                                                                                                                                                          | 12 (27.9%) |
| Which quality of life (QoL) assessment tools do you use?                                                                                                                                                              | 5 (11.6%)  |
| <b>3. Supportive care</b>                                                                                                                                                                                             |            |
| <b>Infectious prophylaxis</b>                                                                                                                                                                                         |            |
| Do you provide primary anti-bacterial prophylaxis?                                                                                                                                                                    | 11 (25.6%) |
| What is your preferred compound for primary anti-bacterial prophylaxis?                                                                                                                                               | 3 (7.0%)   |
| Which other compound(s) do you use for anti-bacterial prophylaxis?                                                                                                                                                    | 0          |
| Do you provide primary anti-mycotic prophylaxis?                                                                                                                                                                      | 11 (25.6%) |
| What is your preferred compound for primary anti-mycotic prophylaxis?                                                                                                                                                 | 8 (18.6%)  |
| Which other compound(s) do you use for primary anti-mycotic prophylaxis?                                                                                                                                              | 0          |
| Do you provide primary anti-viral prophylaxis?                                                                                                                                                                        | 11 (25.6%) |
| What is your preferred compound for primary anti-viral prophylaxis?                                                                                                                                                   | 6 (14%)    |
| Which other compound(s) do you use for primary anti-viral prophylaxis?                                                                                                                                                | 0          |
| Do you provide primary anti-Pneumocystis prophylaxis?                                                                                                                                                                 | 11 (25.6%) |
| What is your preferred compound for anti-PCP prophylaxis?                                                                                                                                                             | 6 (14%)    |
| Do you use a CD4 T-cell lymphocyte trigger to provide anti-viral and anti-PCP prophylaxis?                                                                                                                            | 6 (14%)    |
| What is the CD4 threshold value (cells/ $\mu$ l) you use?                                                                                                                                                             | 1 (2.3%)   |
| <b>4. Growth factors</b>                                                                                                                                                                                              |            |
| <b>Erythropoietin Stimulating Agents (ESA)</b>                                                                                                                                                                        |            |
| What is your initial starting dose for epoetin beta (e.g. Recormon®, total dose/Units)/epoetin alfa (e.g. Eprex®, total dose/Units) or darbepoetin alfa (Aranesp®, total dose/mcg) in patients without renal failure? | 0          |
| What is your initial dosing interval?                                                                                                                                                                                 | 0          |
| What is the dosing schedule you use for G-CSF treatment in ESA-refractory patients?                                                                                                                                   | 10 (23.3%) |
| <b>Granulocyte-Colony-Stimulating Factor (G-CSF)</b>                                                                                                                                                                  |            |
| What is your neutrophil trigger for primary infection prophylaxis?                                                                                                                                                    | 4 (9.3%)   |
| <b>Thrombopoietin-Receptor Agonist (TPO-RA)</b>                                                                                                                                                                       |            |
| Which other dose do you use?                                                                                                                                                                                          | 2 (4.7%)   |
| <b>5. Disease modifying treatment</b>                                                                                                                                                                                 |            |
| <b>Lenalidomid (LEN)</b>                                                                                                                                                                                              |            |
| Which thromboembolic prophylaxis do you use in patients with sufficient platelet count?                                                                                                                               | 11 (25.6%) |
| Specify the drug you use for thromboembolic prophylaxis                                                                                                                                                               | 1 (2.3%)   |
| <b>Immunosuppressive treatment (IST)</b>                                                                                                                                                                              |            |
| What type of ATG do you use?                                                                                                                                                                                          | 2 (4.7%)   |
| What CsA serum level do you aim for, if tolerated?                                                                                                                                                                    | 2 (4.7%)   |
| How long do you wait for response to ATG/CsA (months)?                                                                                                                                                                | 2 (4.7%)   |
| How many ATG cycles do you try?                                                                                                                                                                                       | 2 (4.7%)   |
| What is your indication for steroids?                                                                                                                                                                                 | 14 (22.6%) |
| <b>Hypomethylating agents (HMA)</b>                                                                                                                                                                                   |            |
| Please specify the standard dose you use for 5-azacytidine (AZA)                                                                                                                                                      | 0          |
| What is the standard dose you use for decitabine (DEC)?                                                                                                                                                               | 1 (2.3%)   |
| Please specify the standard dose you use for decitabine (DEC).                                                                                                                                                        | 0          |
| To which extent do you reduce the dose of HMA in responding patients after 6 cycles?                                                                                                                                  | 0          |
| How do you extend the interval of HMA application in responding patients after 6 cycles?                                                                                                                              | 9 (20.9%)  |
| <b>6. Allogeneic hematopoietic stem cell transplantation (n=6)</b>                                                                                                                                                    |            |
| <b>Induction therapy</b>                                                                                                                                                                                              |            |

|                                                                                                                                  |   |
|----------------------------------------------------------------------------------------------------------------------------------|---|
| Please specify your preferential induction chemotherapy regimen for fit MDS patients with <5% blasts eligible for allo HSCT      | 0 |
| Please specify your preferential induction chemotherapy regimen for fit MDS patients with >5% blasts eligible for allo HSCT      | 0 |
| Please specify your preferential induction chemotherapy regimen for unfit MDS patients with <5% blasts eligible for allo HSCT    | 0 |
| Please specify your preferential induction chemotherapy regimen for less fit MDS patients with >5% blasts eligible for allo HSCT | 0 |
| <b>Conditioning therapy</b>                                                                                                      |   |
| Please specify your preferred conditioning regimen for fit MDS patients with <5% BM blasts                                       | 0 |
| Please specify your preferred conditioning regimen for fit MDS patients with >5% BM blasts                                       | 0 |
| Please specify your preferred conditioning regimen for less fit MDS patients with <5% BM blasts                                  | 0 |
| Please specify your preferred conditioning regimen for less fit MDS patients with >5% BM blasts                                  | 0 |
